# Supplementary material for: Understanding flow dynamics, viability and metastatic potency of cervical cancer (HeLa) cells through constricted microchannel
Source: PubMed Central journal article supplement (PMC6255798; doi:10.1038/s41598-018-35646-3), 2018-11-26
Supplement: 41598_2018_35646_MOESM5_ESM.pdf [file 41598_2018_35646_MOESM5_ESM.pdf]

## Supplementary Information

### Understanding flow dynamics, viability and metastatic potency of cervical cancer (HeLa) cells through constricted microchannel

Binita Nath<sup>a</sup>, Asif Raza<sup>b</sup>, Vishal Sethi<sup>a</sup>, Amaresh Dalal<sup>a</sup>, Siddhartha Sankar Ghosh<sup>b</sup> and  
Gautam Biswas<sup>a\*</sup>

<sup>a</sup> Department of Mechanical Engineering, Indian Institute of Technology, Guwahati – 781039,  
India

<sup>b</sup> Department of Bioscience and Bioengineering, Indian Institute of Technology, Guwahati -  
781039, India

**Correspondence should be addressed to:** Gautam Biswas, Department of Mechanical  
Engineering, Indian Institute of Technology Guwahati, Guwahati-39, Assam, India

Ph no.: +0361-258-2001; Fax: +0361-269-2321; Email: [gtm@iitg.ernet.in](mailto:gtm@iitg.ernet.in)

**Supplementary video S1** shows the entire channel from the inlet to the outlet reservoir.

**Supplementary video S2** shows the motion of a single HeLa cell through the constricted channel.

**Supplementary video S3** shows the motion of three HeLa cells through the constricted channel.

**Supplementary video S4** shows the motion of aggregated HeLa cells through the constricted channel.
